# Supplementary material
Source: publisher figshare collection journal article supplement (https://sage.figshare.com/ndownloader/files/13765268)
Supplement: Supplementary file 1 [file 13765268]

Table 2: Participant characteristics (number unless stated)

|                   | Intervention (n=21) | Control (n=10) |
|-------------------|---------------------|----------------|
| Age group         |                     |                |
| ≤65 years         | 4                   | 2              |
| 66 – 80 years     | 15                  | 8              |
| ≥80 years         | 2                   | 0              |
| Sex (Male %)      | 71                  | 70             |
| MRC Grade         |                     |                |
| Grade 1           | 9                   | 1              |
| Grade 2           | 12                  | 9              |
| HRQoL             |                     |                |
| 0                 | 7                   | 4              |
| 1                 | 14                  | 6              |
| Geography         |                     |                |
| Urban             | 13                  | 6              |
| Rural             | 8                   | 4              |
| Employment status |                     |                |
| Retired           | 19                  | 10             |
| Semi-retired      | 2                   | 0              |

Smoking Status: Occasional = <5 cigarettes per day; Heavy = 20 plus cigarettes per day; Medical Research Council (MRC) dyspnea grade: 1 = only breathless on strenuous exercise; 2 = short of breath when hurrying on level ground or up a slight hill; Health Related Quality of Life (HRQoL) – Functional limitations item of St George’s Respiratory Questionnaire: 0 = COPD does not stop me doing anything that I want to do; 1 = COPD stops me doing one or two things that I would like to do
